# Supplementary material for: A flexible and fully recyclable transparent conductive organogel based on KI-containing glycerol with excellent anti-freezing and anti-drying behavior
Source: Royal Society of Chemistry journal article supplement (doi:10.1039/d2tc03005e), 2022-01-01
Supplement: d2tc03005e3.pdf [file d2tc03005e3.pdf]

## A flexible and fully recyclable transparent conductive organogel based on KI-containing glycerol with excellent anti-freezing and anti-drying behavior

Jiaqing He<sup>a</sup>, Kaixiang Yang<sup>a</sup>, Qiang Zhou<sup>a</sup>, Yongjun Xie<sup>a</sup>, Gang Zou<sup>a\*</sup> and Haiyang Yang<sup>a\*</sup>

<sup>a</sup> CAS Key Laboratory of Soft Matter Chemistry, School of Chemistry and Materials Science, University of Science and Technology of China, Hefei, 230026, P. R. China.  
E-mail: yhy@ustc.edu.cn

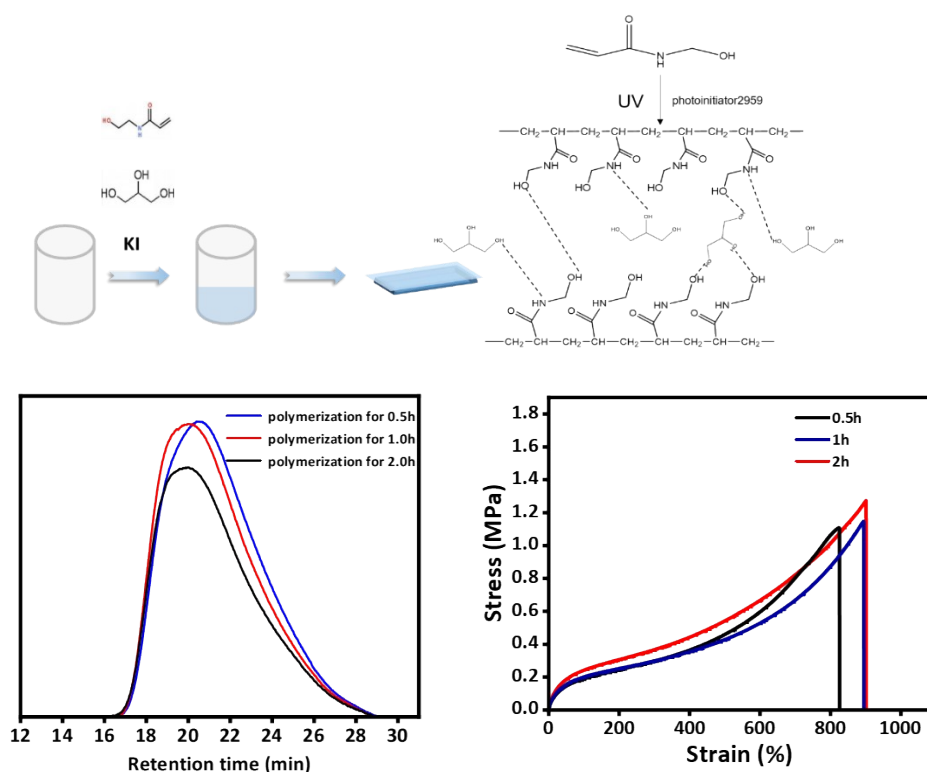

**Figure S1** (a)Preparation of HEAA-KI-Gly conductive organogels. (b) GPC profile of PHEAA-KI-Gly organogels with different exposure durations under UV light. H<sub>2</sub>O was used as the eluent. (c) The effect of different polymerization times contents on the mechanical properties of the HEAA-KI-Gly organogel.

**Table 1** Proportions of different substances in the preparation of the HEAA-KI-Gly organogel.

| HEAA  | photo-initiator | KI   | Glycerol |
|-------|-----------------|------|----------|
| 4.5g  | 0.045g          | 0g   | 0.55g    |
| 5.0g  | 0.05g           | 0.5g | 0.5g     |
| 5.25g | 0.0525g         | 1.0g | 0.475g   |
| 5.5g  | 0.055g          | 1.5g | 0.45g    |

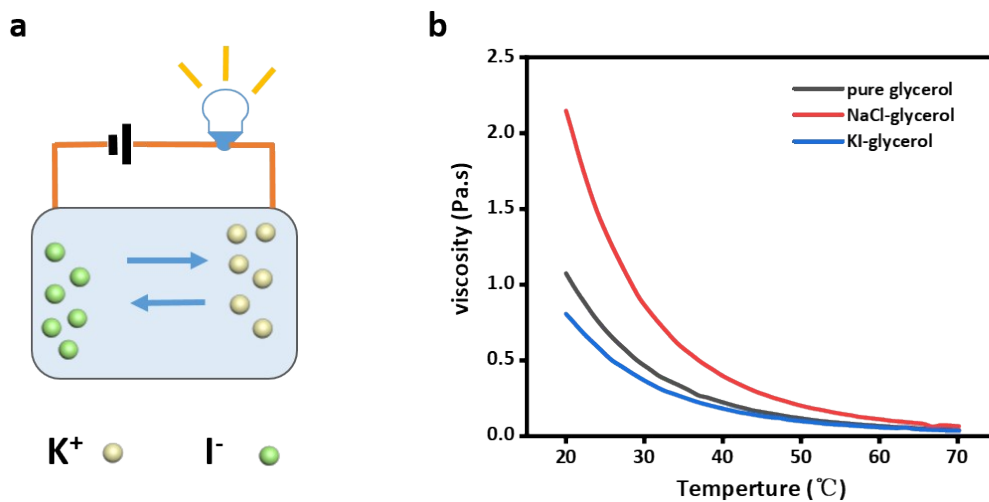

**Figure S2** (a) Schematic of the conduction mechanism of the KI-Gly solution, (b) Viscosity variation of glycerol, KI-Gly solution and NaCl-Gly solution at temperatures ranging from 20.0 to 70.0 °C.

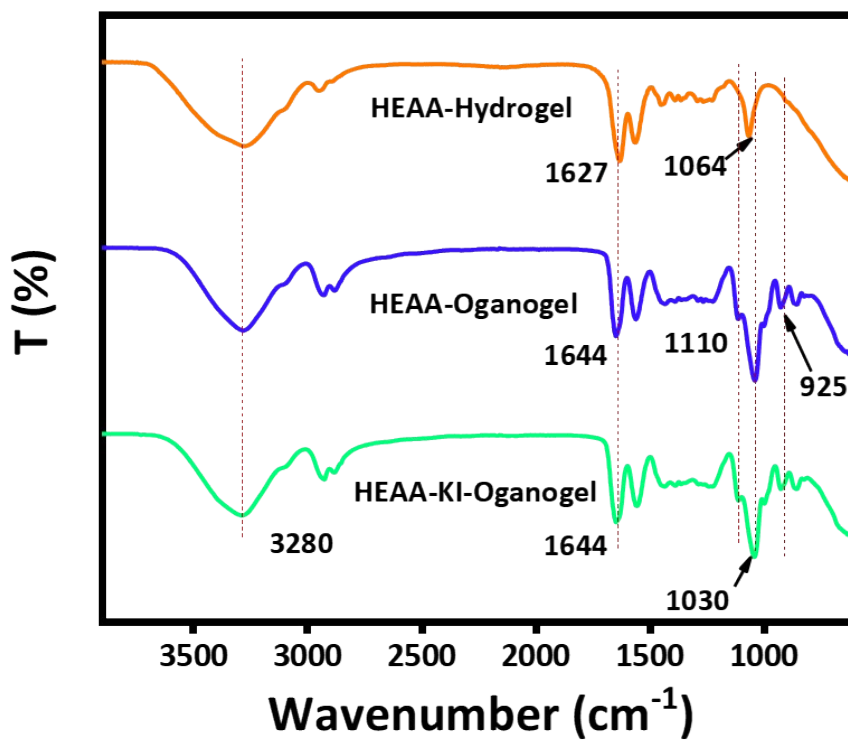

**Figure S3** FT-IR spectra of a) HEAA hydrogel, b) HEAA-Gly organogel and c) HEAA-KI-Gly organogel.

a

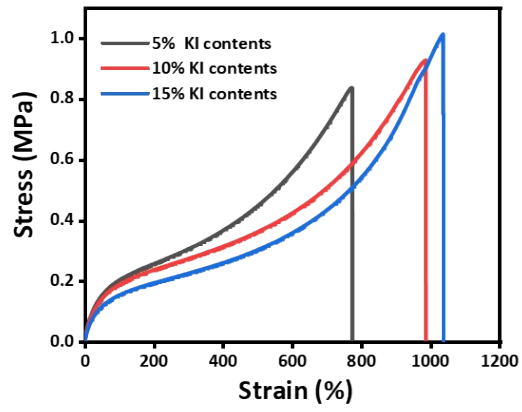

b

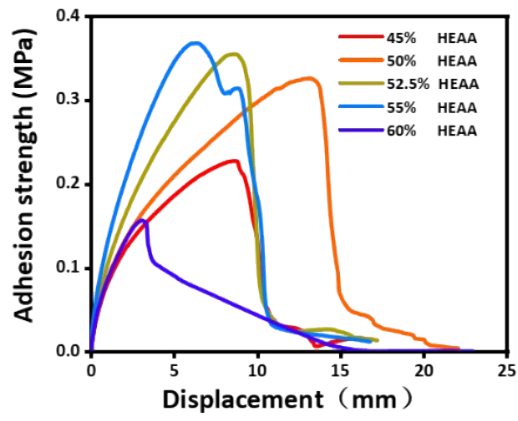

c

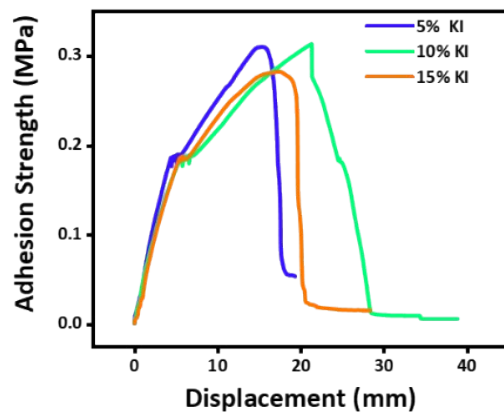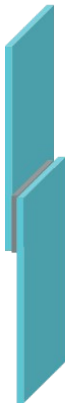

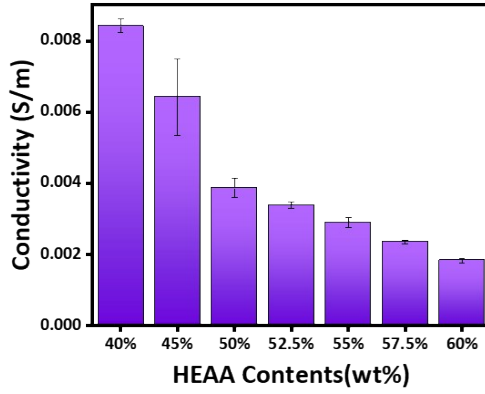

**Figure S5** The effect of different HEAA monomer contents on the electrical conductivity of organogels.

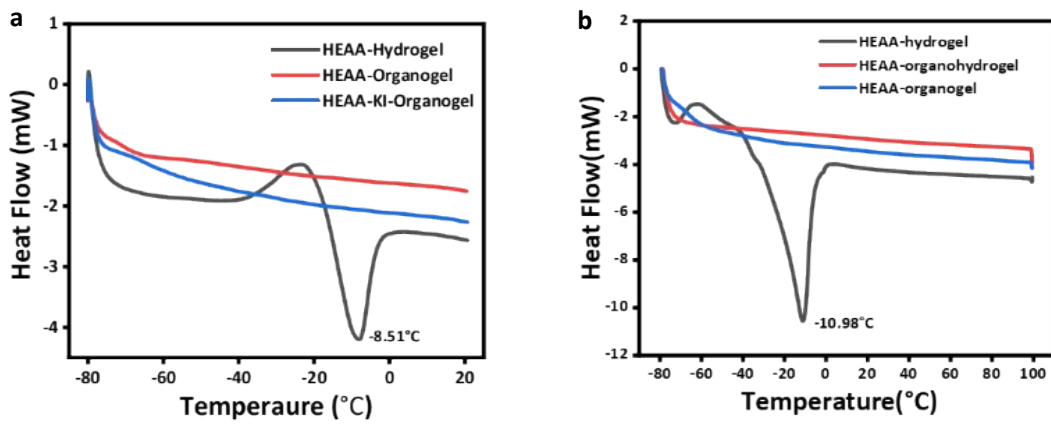

**Figure S6** DSC thermograms of HEAA-KI-Gly organogels, HEAA-Gly organogels and HEAA hydrogels.

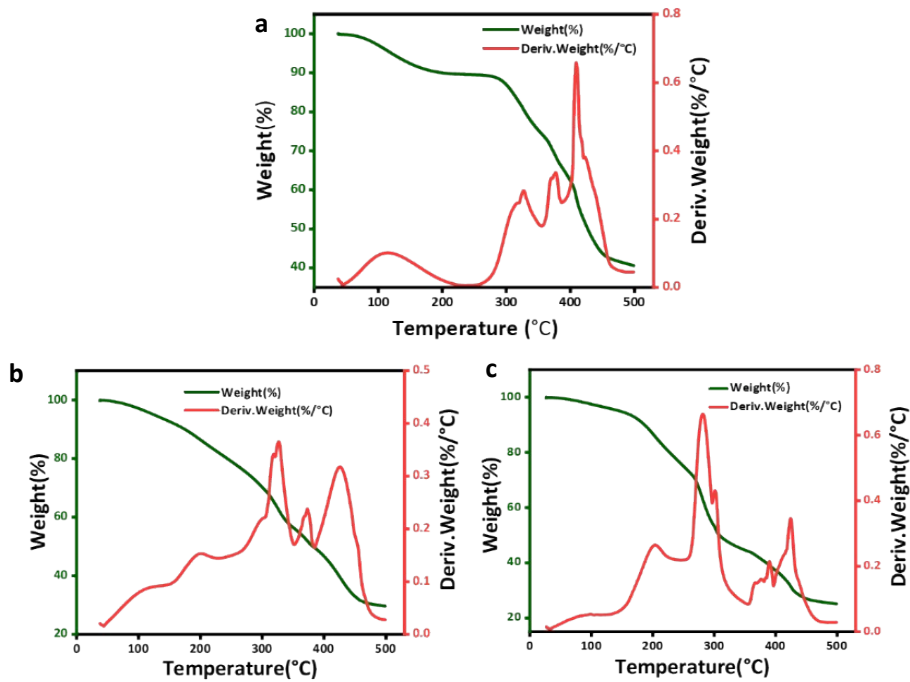

**Figure S7** TGA thermograms of (a)HEAA hydrogel, (b)HEAA organohydrogel, and (c)HEAA-Gly organogel

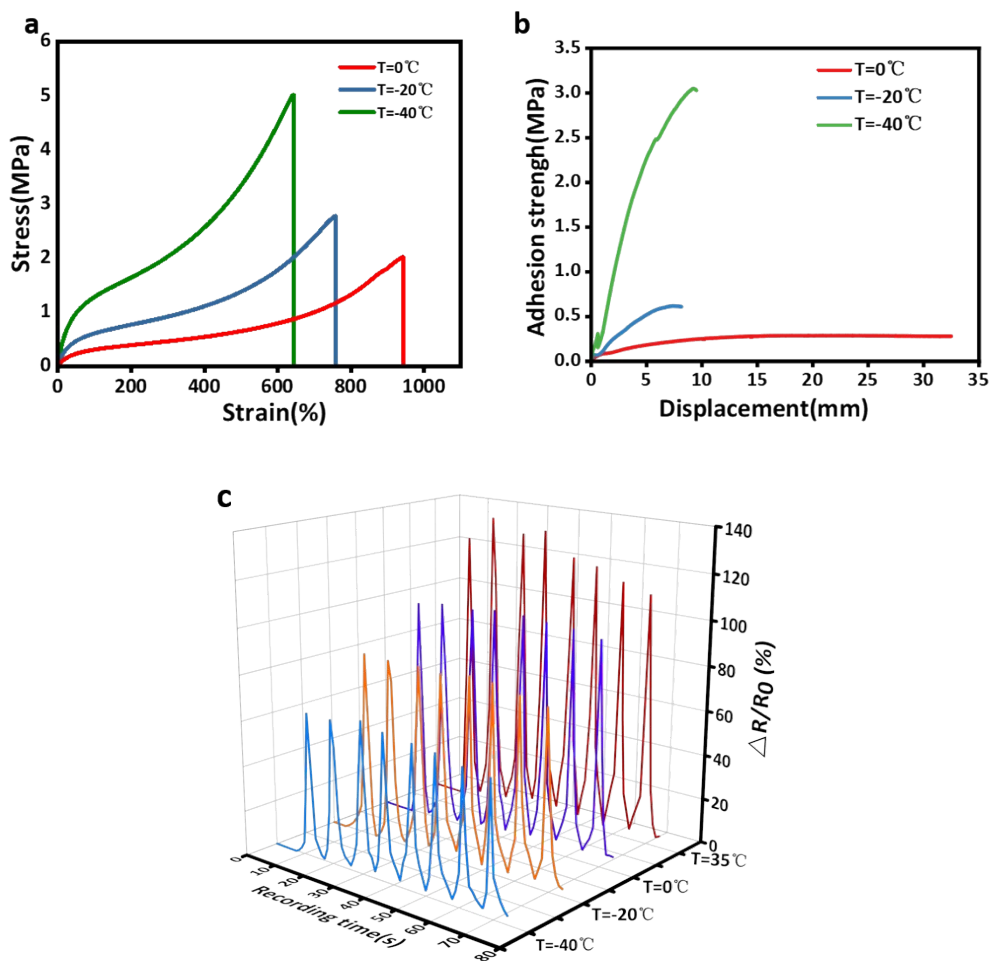

**Figure S8** (a) The effect of different temperature contents on the mechanical properties of the HEAA-KI-Gly organogel. (b) Adhesion strength of organogels with different different temperature. (c) Relative resistance changes ( $\Delta R/R_0$ ) at different temperatures under 100% tensile strain

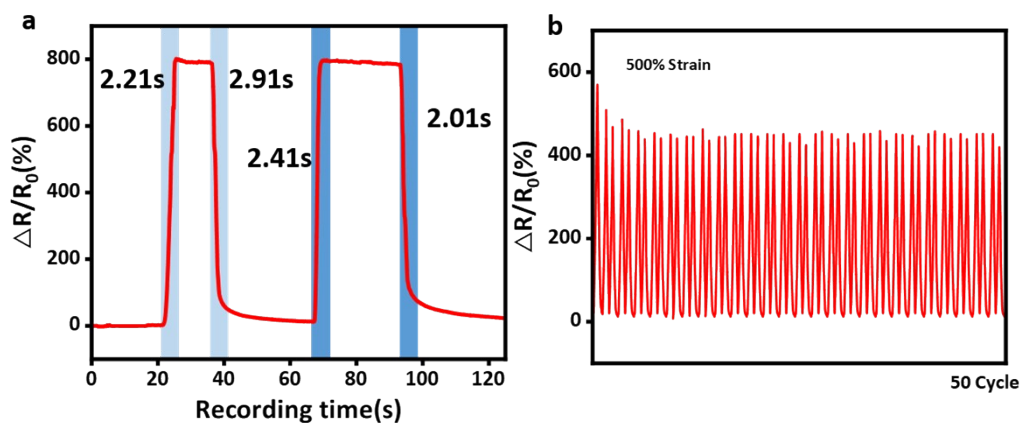

**Figure S9** (a) Relative resistance changes ( $\Delta R/R_0$ ) response time of organogels under 800% strain. (b) The durability test under repeated strains of 500% for 50 cycles.

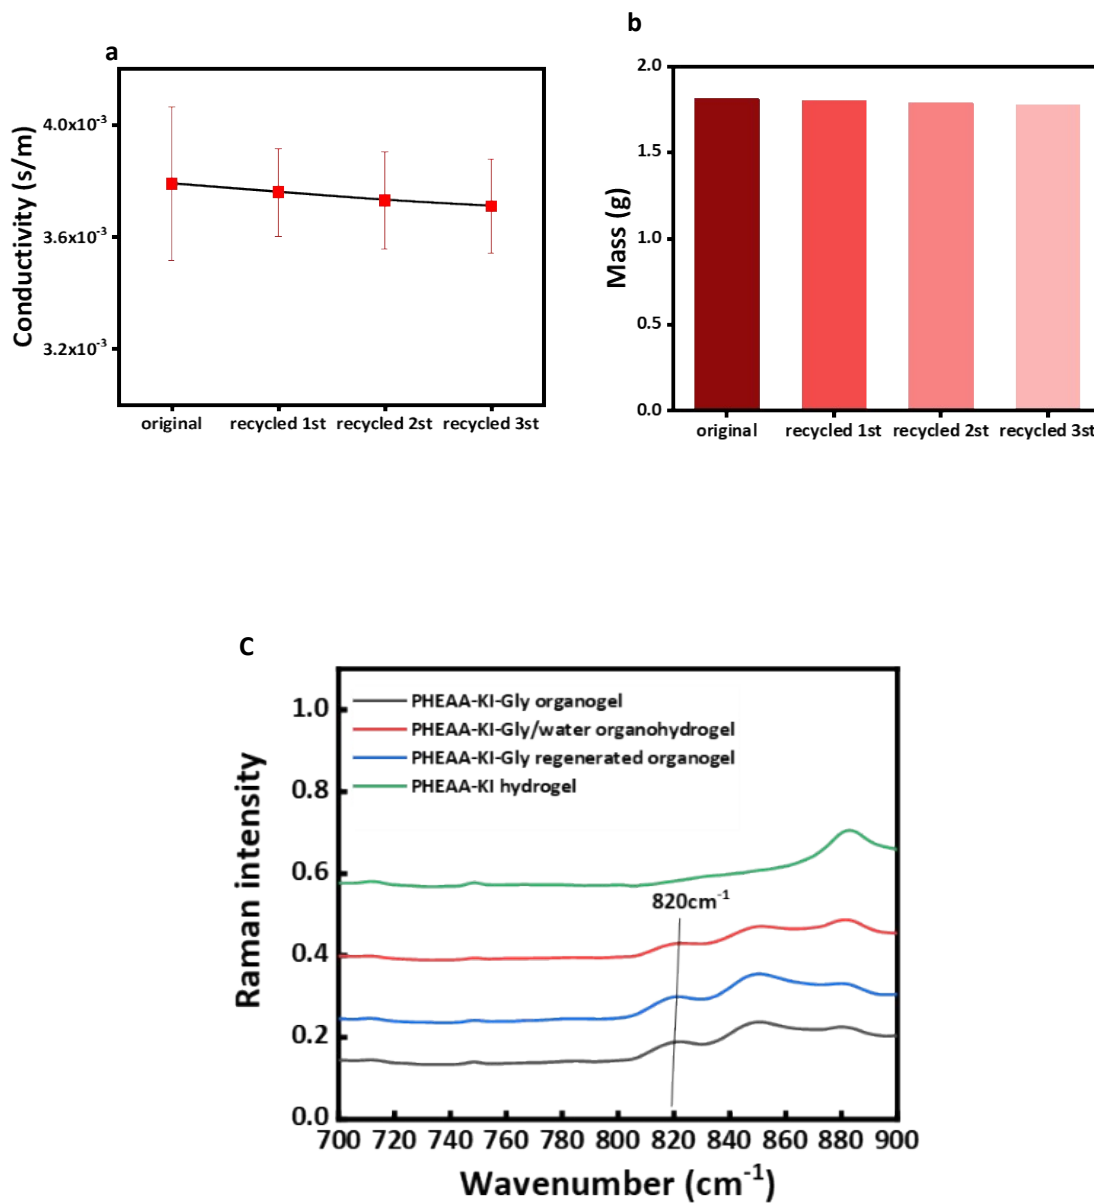

**Figure S10** Comparison of quality (a) and conductivity (b) of organic gel films before and after recycling. (c) Raman Spectroscopy of PHEAA-KI-Gly organogel, PHEAA-KI-Gly/water organohydrogel, PHEAA-KI-Gly regenerated organogel and PHEAA-KI hydrogel.

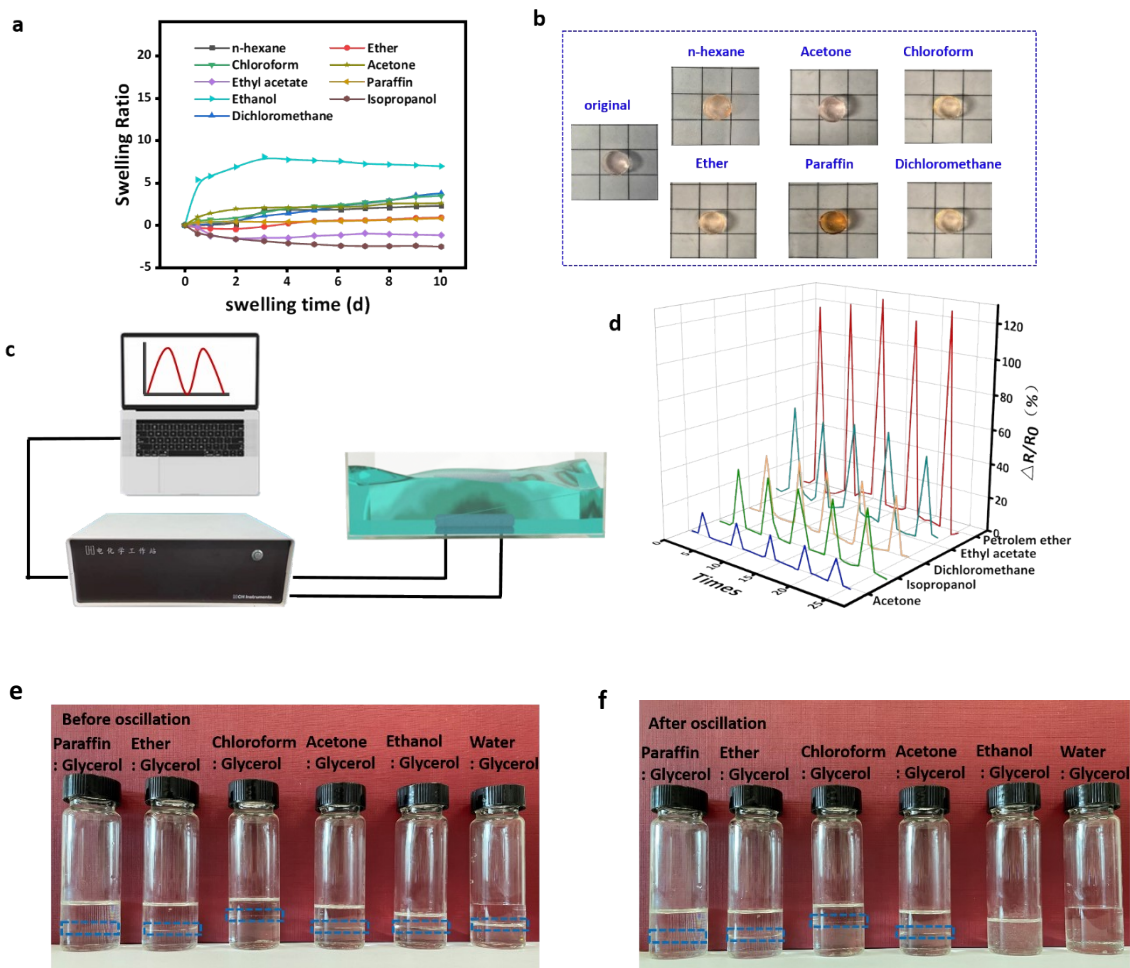

**Figure S11** Swelling pictures(a) and swelling ratios(b) of organogel before and after swelling in different low polarity solvents. (c) Illustration of hydrogel sensors applied in solvents. (d) Real-time relative resistance variation of sensors with stretching (under 50% strain) in various solvents. Mutual solubility of solvents with different polarities and glycerol (e)before oscillation and (f) after oscillation

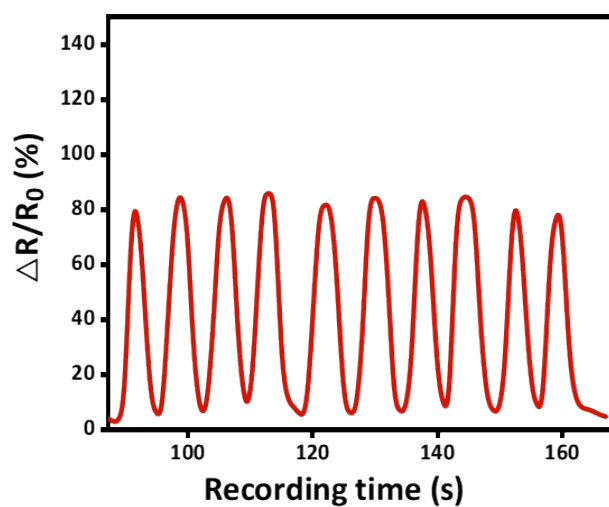

**Table 2** Comparison of the performance of glycerol organogels and glycerol water organohydrogels

| Materials(G/W organohydrogel) | Temperature range of application | Stretchability | Recyclability | Adhesiveness |
|-------------------------------|----------------------------------|----------------|---------------|--------------|
| PDA-CNTs-PACA <sup>1</sup>    | -20°C to 60°C                    | 600%           | no            | 60KPa        |
| PVA-HEC <sup>2</sup>          | -30°C to 65°C                    | 400%           | no            | no           |
| PVA-PANI <sup>3</sup>         | -20°C                            | 472%           | yes           | no           |
| PEDOT:PSS-SF <sup>4</sup>     | -40 °C to 60 °C                  | 100%           | no            | no           |
| P(AM-MAANa-DMC) <sup>5</sup>  | -20°C                            | 1500%          | no            | no           |
| PDMAPS-SA <sup>6</sup>        | -25°C to 25°C                    | 50%            | no            | no           |
| PAA-CNF <sup>7</sup>          | -46°C                            | 980%           | no            | 25KPa        |
| P(SBMA-HEAA) <sup>8</sup>     | -30°C to 60°C                    | 600%           | no            | 21KPa        |
| This work                     | -60°C to 70°C                    | 1200%          | yes           | 300KPa       |

### Notes and references

1. L. Han, K. Liu, M. Wang, K. Wang, L. Fang, H. Chen, J. Zhou and X. Lu, *Advanced Functional Materials*, 2018, **28**, 1704195.
2. X. Wang, X. Wang, M. Pi and R. Ran, *Chemical Engineering Journal*, 2022, **428**, 131172.
3. C. Hu, Y. Zhang, X. Wang, L. Xing, L. Shi and R. Ran, *ACS Appl Mater Interfaces*, 2018, **10**, 44000-44010.
4. J. Liu, H. Wang, R. Ou, X. Yi, T. Liu, Z. Liu and Q. Wang, *Chemical Engineering Journal*, 2021, **426**, 130722.
5. X. Li, L. Kong and G. Gao, *J Mater Chem B*, 2021, **9**, 2010-2015.



6. S. Tian, M. Wang, X. Wang, L. Wang, D. Yang, J. Nie and G. Ma, *ACS Biomater Sci Eng*, 2022, **8**, 1867-1877.
7. Z. Zhou, K. Liu, Z. Ban and W. Yuan, *Composites Part A: Applied Science and Manufacturing*, 2022, **154**, 106806.
8. K. Yang, J. He, Q. Zhou, X. Hao, H. Yang and Y. You, *Polymer*, 2021, **214**, 123354.
